# Supplementary material for: Aptamer lateral flow assays for rapid and sensitive detection of cholera toxin
Source: Royal Society of Chemistry journal article supplement (doi:10.1039/c8an01616j), 2019-01-01
Supplement: c8an01616j1.pdf [file c8an01616j1.pdf]

## Supporting Information

### Aptamer Lateral Flow Assays for Rapid and Sensitive Detection of Cholera Toxin

Esther Frohnmeyer<sup>a</sup>, Nadine Tuschel<sup>a</sup>, Tobias Sitz<sup>a</sup>, Cornelia Hermann<sup>c</sup>, Gregor Dahl<sup>b</sup>, Florian Schulz<sup>b</sup>, Antje J. Bäumner<sup>c</sup>, Markus Fischer<sup>a\*</sup>

<sup>a</sup>HAMBURG SCHOOL OF FOOD SCIENCE; Institute of Food Chemistry, University of Hamburg, Grindelallee 117, 20146 Hamburg, Germany

<sup>b</sup>Institute of Physical Chemistry, University of Hamburg, Grindelallee 117, 20146 Hamburg, Germany

<sup>c</sup>University of Regensburg, Institute of Analytical Chemistry, Universitätsstr. 31, 93040 Regensburg, Germany

\*Corresponding author: Tel.: +49-40-428384359; Fax: +49-40-428384342; E-Mail:

markus.fischer@chemie.uni-hamburg.de

## Supporting Figures:

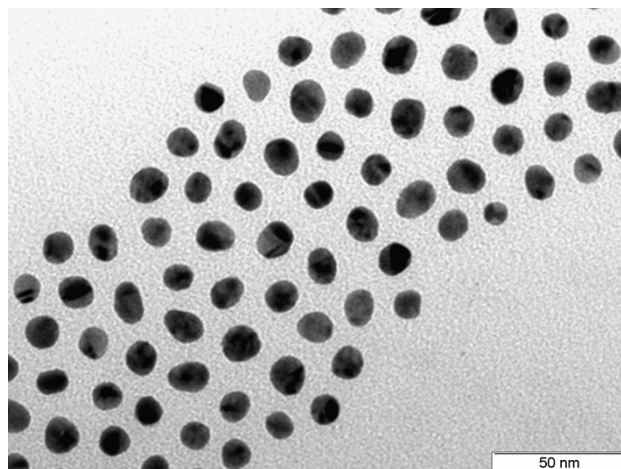

**Fig. S1:** Representative TEM image of AuNPs.

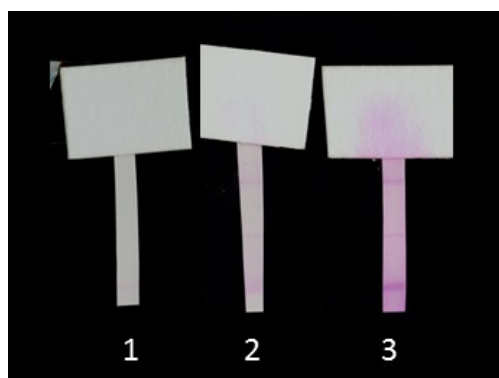

**Fig S2:** Optimization of liposome volumes for GM1-aptamer sandwich. 1: 0.5  $\mu$ l, 2: 2  $\mu$ l, 3: 10  $\mu$ l; CT-B concentration: 250 ng/ml.

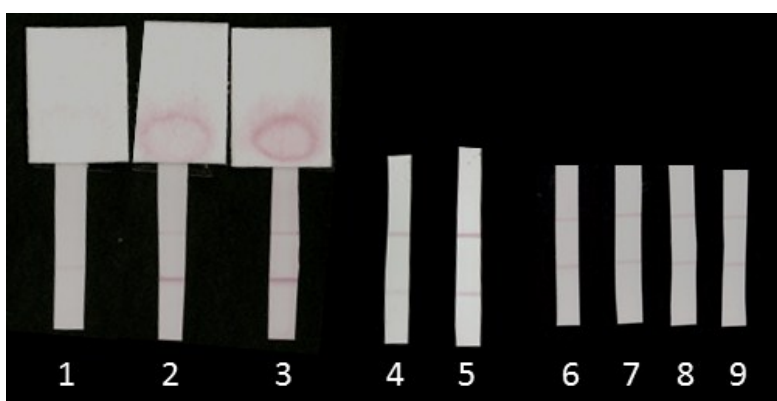

**Fig S3:** Optimization of AuNP concentration, membrane pore size and incubation times for the competitive LFA. 1: 2  $\mu$ l AuNPs@CT916, 2: 5  $\mu$ l AuNPs@CT916, 3: 10  $\mu$ l AuNPs@CT916; 4: HF750, 5: HF180; 6: incubation time 0 min; 7: incubation time 5 min; 8: incubation time 10 min; 9: incubation time 30 min CT-B concentration was always 0 ng/ml for 1-3, 1  $\mu$ g/ml for 4-9.

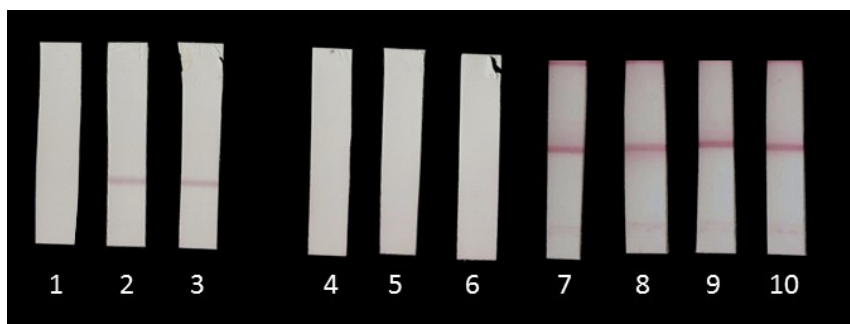

**Fig S4:** Optimization of antibody concentration, immobilization buffer and AuNP@CT916 incubation time with sample for the aptamer-antibody sandwich. 1: Carbonate buffer pH 9, 6 mg/ml; 2: Carbonate buffer pH 9, 1 mg/ml; 3: Carbonate buffer pH 9, 0.4 mg/ml; 4: Tris-HCl pH 8, 6 mg/ml; 5: Tris-HCl pH 8, 1 mg/ml; 6: Tris-HCl pH 8, 0.4 mg/ml; 7: incubation time 0 min; 8: incubation time 5 min; 9: incubation time 10 min; 10: incubation time 30 min; CT-B concentration was always 250 ng/ml; control lines omitted.

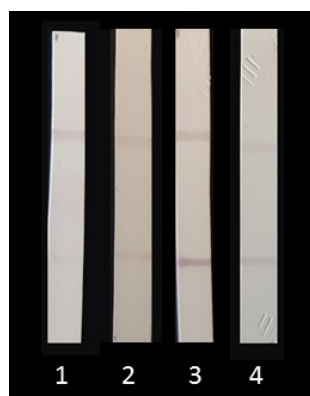

**Fig S5:** Optimization of antibody incubation times in aptamer-antibody-antibody sandwich. 1: incubation time 0 min; 2: incubation time 5 min; 3: incubation time 10 min; 4: incubation time 30 min; CT-B concentration was 500 ng/ml, AuNP@CT916 incubation time with sample was 10 min.
